# Supplementary material for: A novel motif in the yeast mitochondrial dynamin Dnm1 is essential for adaptor binding and membrane recruitment
Source: PubMed Central journal article supplement — J Cell Biol. 2012 Nov 12;199(4):613–22. doi: 10.1083/jcb.201207079 (PMC3494853; doi:10.1083/jcb.201207079), 2012-11-12
Supplement: supp_jcb.201207079_JCB_201207079_sm.pdf [file supp_jcb.201207079_JCB_201207079_sm.pdf]

Bui et al., <http://www.jcb.org/cgi/content/full/jcb.201207079/DC1>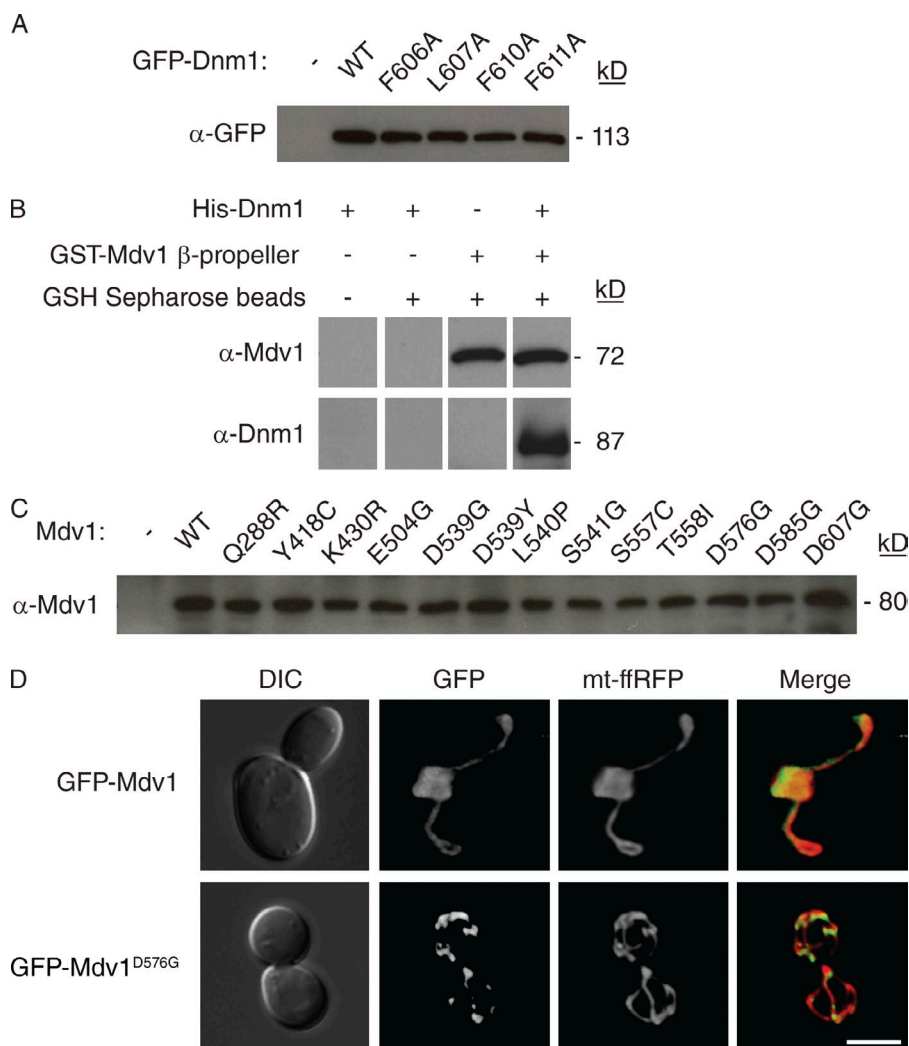

Figure S1. **Expression, interaction, and assembly properties of Dnm1 and Mdv1 variants.** (A) Steady-state abundance of N-terminal GFP-tagged WT and Dnm1<sup>InsBmut</sup> proteins expressed from a plasmid in *dnm1* $\Delta$  cells. Whole cell lysates from 0.5 OD<sub>600</sub> cell equivalents were separated by SDS-PAGE and immunoblotted with anti-GFP antibody. (B) In vitro GST pull-down assay. Bacterial expressed GST-Mdv1  $\beta$ -propeller immobilized on glutathione resin was incubated for 2 h at 4°C with purified His-Dnm1 expressed in insect cells from a previously described plasmid (Ingeman et al., 2005). After washing, bound proteins were eluted, separated by SDS-PAGE, and immunoblotted with anti-Mdv1 and -Dnm1 antibodies. (C) Steady-state abundance of Mdv1 suppressor proteins. Whole cell lysates from 0.5 OD<sub>600</sub> cell equivalents were separated by SDS-PAGE and immunoblotted with anti-Mdv1 antibody. (D) Representative images of GFP-Mdv1 and GFP-Mdv1<sup>D576G</sup> localization in cells expressing Dnm1<sup>F610A</sup> from the genome. Differential interference contrast microscopy (DIC), mitochondrial matrix-targeted dsRed (mt-ffRFP), GFP, and merged images are shown. Bar, 5  $\mu$ m.

Table S1. Screen for *mdv1* suppressors of *dnm1<sup>F610A</sup>*

| Strain                                                                              | 25°C                     |                 | 37°C                     |                 |
|-------------------------------------------------------------------------------------|--------------------------|-----------------|--------------------------|-----------------|
|                                                                                     | Mitochondrial morphology | Glycerol growth | Mitochondrial morphology | Glycerol growth |
| <i>fzo1-1 (ts) DNM1 MDV1</i>                                                        | WT/Not fragmented        | Yes             | Fragmented               | No              |
| <i>fzo1-1 mdv1Δ dnm1::dnm1<sup>F610A</sup></i>                                      | Nets                     | Yes             | Not fragmented           | Yes             |
| <i>fzo1-1 mdv1Δ dnm1::dnm1<sup>F610A</sup> expressing Mdv1<sup>WT</sup></i>         | Nets                     | Yes             | Not fragmented           | Yes             |
| <i>fzo1-1 mdv1Δ dnm1::dnm1<sup>F610A</sup> expressing Mdv1<sup>suppressor</sup></i> | WT/Not fragmented        | <b>Yes</b>      | Fragmented               | <b>No</b>       |

See Materials and methods for additional description of genetic screen. Bold terms emphasize the genotype and phenotype sought in the described genetic screen.

Table S2. Plasmids used in this study

| ID number                | Plasmid                                                                                 | Source                             |
|--------------------------|-----------------------------------------------------------------------------------------|------------------------------------|
| B363                     | <i>pRS415-DNM1</i>                                                                      | Otsuga et al., 1998                |
| B2901, B2902, B2940-2945 | <i>pRS415-DNM1<sup>(F606A, L607A, N608A, Y609A, F610A, F611A, G612A or K613A)</sup></i> | This study                         |
| B2144                    | <i>pRS415-MET25-GFP-DNM1</i>                                                            | Karren et al., 2005                |
| B2949, B3004-3006        | <i>pRS415-MET25-GFP-DNM1</i> ,<br><i>pRS426-DNM1-3xHA</i>                               | This study,<br>Karren et al., 2005 |
| B2947, B2973-2975        | <i>pRS426-DNM1<sup>(F606A, L607A, F610A or F611A)</sup>-3xHA</i>                        | This study                         |
| B955                     | <i>pRS425-DNM1-MYC</i>                                                                  | Karren et al., 2005                |
| B2950, B3007-3009        | <i>pRS425-DNM1<sup>(F606A, L607A, F610A or F611A)</sup>-MYC</i>                         | This study                         |
| B1642, B1643             | <i>pRS414-GPD-mt-ffRFP</i> , <i>pRS416-GPD-mt-ffRFP</i>                                 | Karren et al., 2005                |
| B2053                    | <i>pRS416-MET25-MDV1</i>                                                                | Karren et al., 2005                |
| B3312-B3323              | <i>pRS416-MET25-MDV1<sup>suppressor</sup></i>                                           | This study                         |
| B3324                    | <i>pGAD-C1-DNM1</i>                                                                     | This study                         |
| B3325                    | <i>pGAD-C1-DNM1<sup>F610A</sup></i>                                                     | This study                         |
| B3352                    | <i>pGBD-C1-DNM1</i>                                                                     | This study                         |
| B3353-3356               | <i>pGBD-C1-DNM1<sup>F606A, L607A, F610A, F611A</sup></i>                                | This study                         |
| B3326                    | <i>pGBD-C1-MDV1</i>                                                                     | This study                         |
| B3327-3338               | <i>pGBD-C1-MDV1<sup>suppressor</sup></i>                                                | This study                         |
| B2455, B2456             | <i>pGAD-C</i> , <i>pGBD-C1</i>                                                          | Guthrie and Fink, 2002             |

## References

- Guthrie, C., and G. Fink. 2002. Guide to yeast genetics and molecular biology. *Methods in enzymology series*. Vol. 350. San Diego: Academic Press, Inc.
- Ingerman, E., E.M. Perkins, M. Marino, J.A. Mears, J.M. McCaffery, J.E. Hinshaw, and J. Nunnari. 2005. Dnm1 forms spirals that are structurally tailored to fit mitochondria. *J. Cell Biol.* 170:1021–1027. <http://dx.doi.org/10.1083/jcb.200506078>
- Karren, M.A., E.M. Coonrod, T.K. Anderson, and J.M. Shaw. 2005. The role of Fis1p-Mdv1p interactions in mitochondrial fission complex assembly. *J. Cell Biol.* 171:291–301. <http://dx.doi.org/10.1083/jcb.200506158>
- Otsuga, D., B.R. Keegan, E. Brisch, J.W. Thatcher, G.J. Hermann, W. Bleazard, and J.M. Shaw. 1998. The dynamin-related GTPase, Dnm1p, controls mitochondrial morphology in yeast. *J. Cell Biol.* 143:333–349. <http://dx.doi.org/10.1083/jcb.143.2.333>
